# Supplementary material for: Hamp Type-1 Promotes Antimicrobial Defense via Direct Microbial Killing and Regulating Iron Metabolism in Grass Carp (Ctenopharyngodon idella)
Source: PubMed Central journal article supplement (PMC7356000; doi:10.3390/biom10060825), 2020-05-28
Supplement: biomolecules-10-00825-s001.pdf [file biomolecules-10-00825-s001.pdf]

1 **Fig.S1**

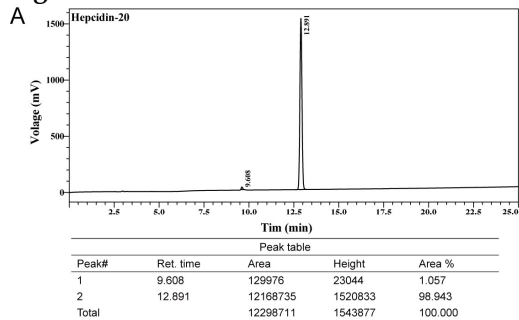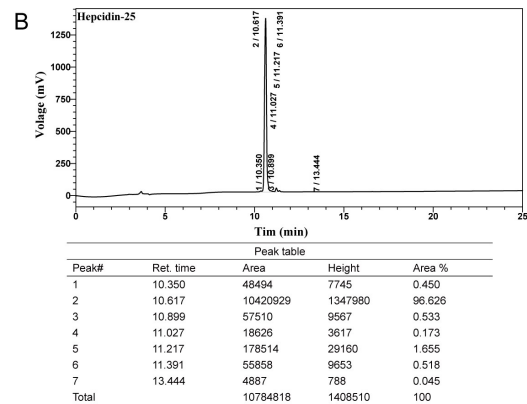

2  
3  
4  
5

**Figure.S1. Purity analysis of hepcidin-20 and -25.** The purified hepcidin-20 (**A**) and -25 (**B**) obtained following preparative RP-HPLC.

6 Fig.S2

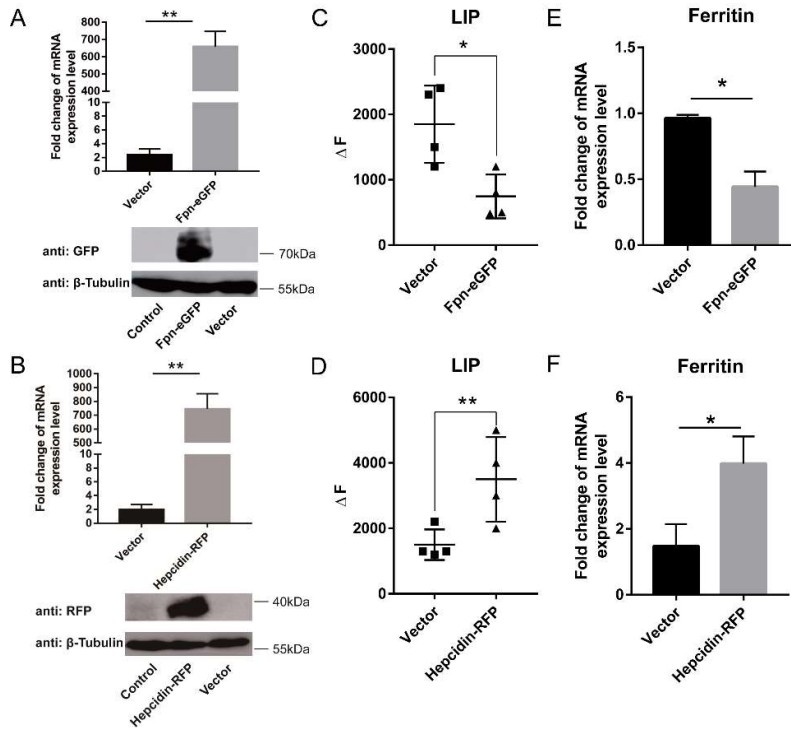

7

8 **Figure.S2. The hepcidin-Fpn axis controls the iron content in L8824 cells.** (A and B) pFpn-  
 9 eGFP, pHepcidin-RFP, and empty vector transiently transfected L8824 cells were seeded in 12-  
 10 well plates. qRT-PCR and western blot (WB) were used to assess the efficiency of Fpn and  
 11 hepcidin overexpression. (C and D) Intracellular labile 219 iron pool (LIP) levels in Fpn and  
 12 hepcidin overexpression samples were detected by fluorometric assay. Calcein (CA)  
 13 fluorescence intensity was measured in the Multiscan Spectrum microplate reader. (E and F)  
 14 The Ferritin expressions were determined at 24 h after cell transfection of plasmid by qRT-PCR.  
 15 Results were expressed as mean  $\pm$  SD (n=4), \* $P$  < 0.05; \*\* $P$  < 0.01.

16

17 Fig.S3

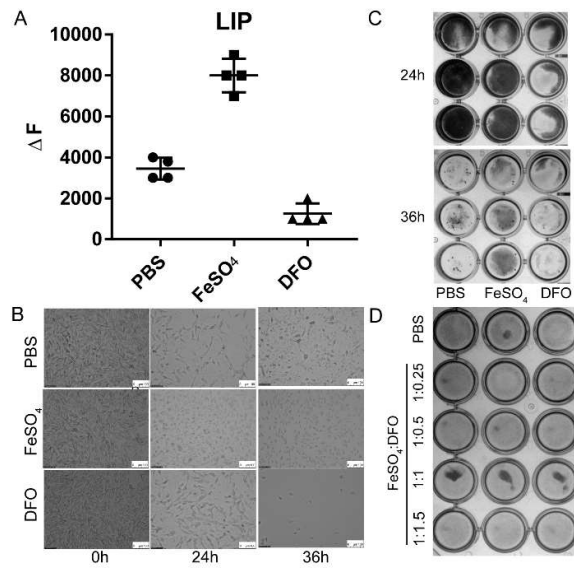

18

19 **Figure.S3. Cellular iron homeostasis affects the ability of L8824 cells to resist bacterial**  
20 **infection. (A)** Cells were seed in 12-well plates for 24 h and then treated with PBS, FeSO<sub>4</sub>, or  
21 DFO for 3 more hours. The LIP levels were detected by fluorometric assay, and the CA  
22 fluorescence intensity was measured in the Multiscan Spectrum microplate reader. After  
23 stimulated with PBS, FeSO<sub>4</sub>, or DFO, the cells were incubated with *A. hydrophila* ( $5 \times 10^6$  CFU/mL,  
24 500  $\mu$ L) for 24 h. Cell density was determined using phase-contrast microscopy **(B)** and crystal  
25 violet staining **(C)**. **(D)** Mix FeSO<sub>4</sub> and DFO in different proportions to stimulate the cells.  
26 Subsequently, cells were incubated with *A. hydrophila* ( $5 \times 10^6$  CFU/mL, 500  $\mu$ L) for 24 h. The  
27 final density of the cell was determined by crystal violet staining.

28

29 Fig.S4

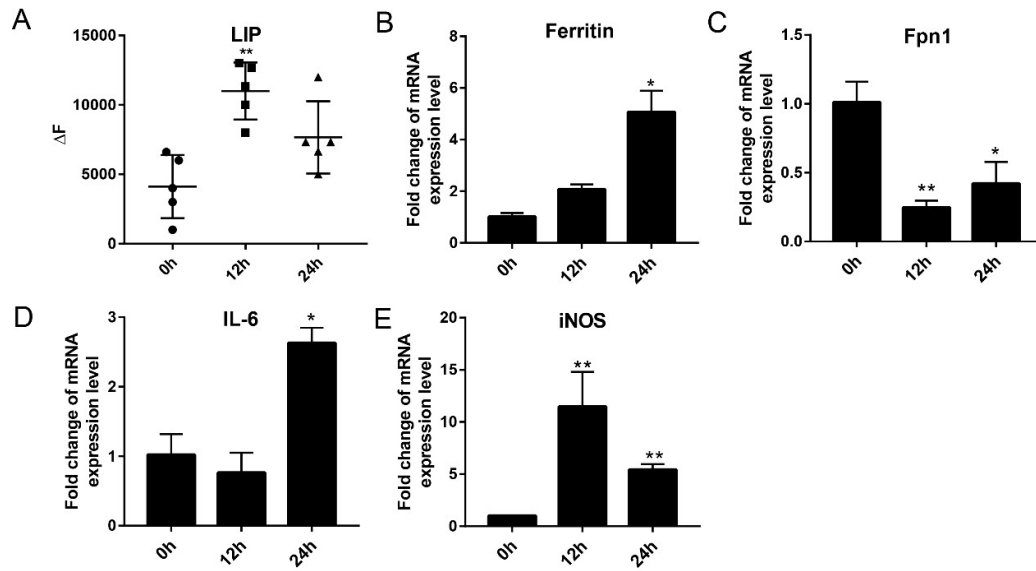

30

31 **Figure.S4. Effect of bacterial gDNA on iron homeostasis and immune regulation in L8824**  
32 **cells. (A)** The LIP content was detected by fluorometric assay after bacterial DNA stimulation.  
33 The cells were harvested for qRT-PCR to quantify the relative expression of Ferritin **(B)**, Fpn  
34 **(C)** IL-6 **(D)**, iNOS **(E)**. Data were expressed as mean ± SD (n=4), \*P<0.05; \*\*P<0.01.

35

36 Figure.S5

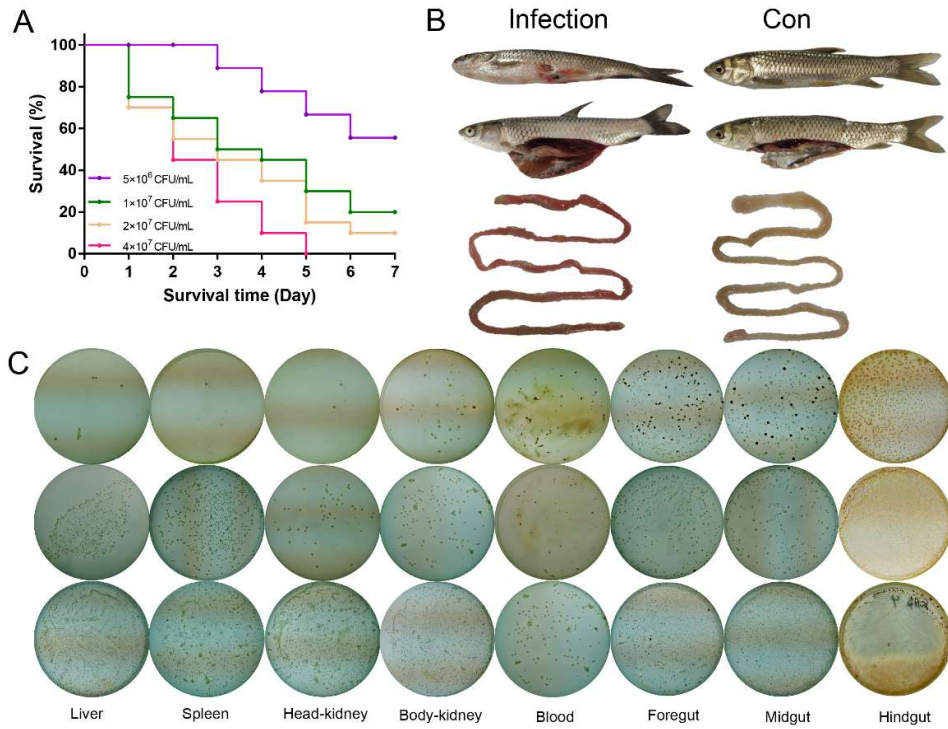

37

38 **Figure.S5. Grass carp model of intestinal tract infection established by *A. hydrophila* strains.**  
39 **(A)**The mortality statistics for the grass carp which infected with a linear concentration gradient  
40 **model of bacteria.****(B)** The symptoms of *A. hydrophila* -infection test in grass carp.**(C)** At 3 days  
41 **post-infection, the bacterial burden in different tissues of grass carp infected with *A. hydrophila*.**
